# Supplementary figures and images for: Use of RAFT macro-surfmers for the synthesis of transparent aqueous colloids with tunable interactions
Source: Royal Society of Chemistry journal article supplement (doi:10.1039/c7sm01084b), 2017-01-01

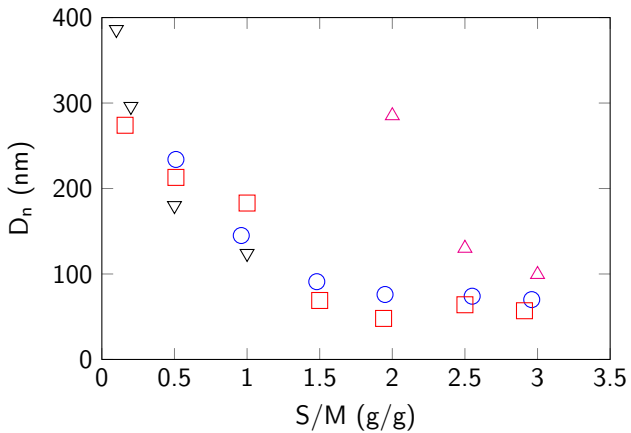

Supplement: c7sm01084b1.zip [file c7sm01084b1.zip]

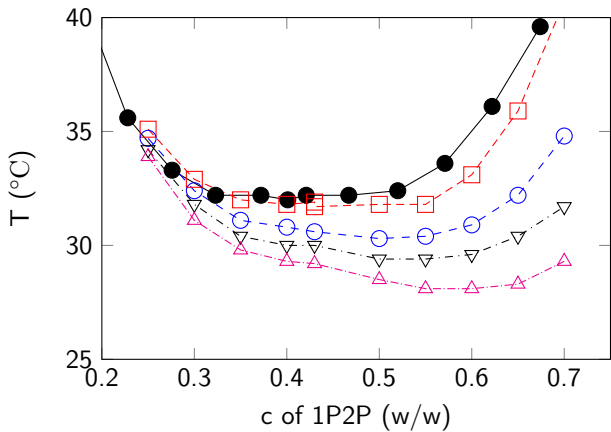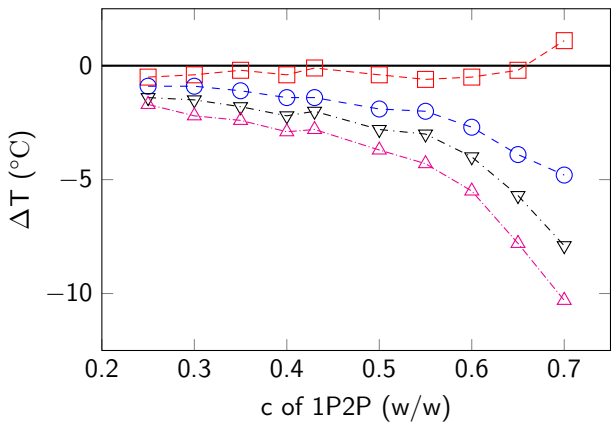

Supplement: c7sm01084b1.zip [file c7sm01084b1.zip]

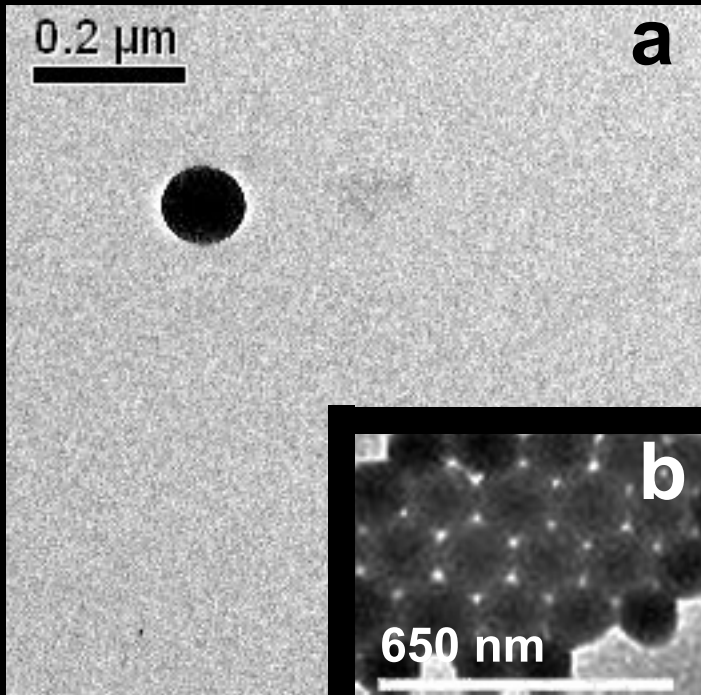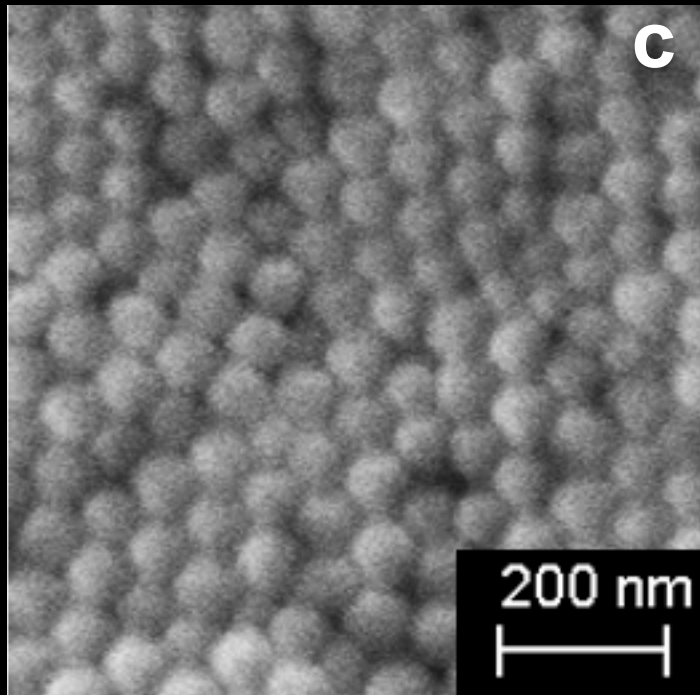

Supplement: c7sm01084b1.zip [file c7sm01084b1.zip]

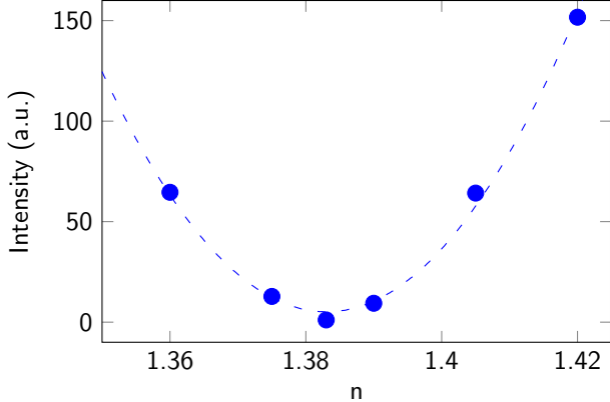

Supplement: c7sm01084b1.zip [file c7sm01084b1.zip]

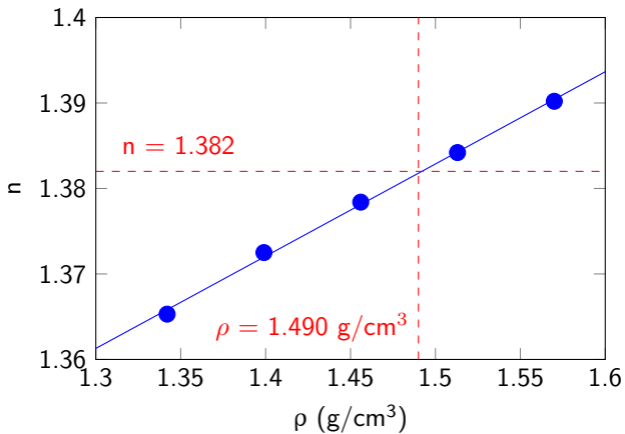

Supplement: c7sm01084b1.zip [file c7sm01084b1.zip]
